# Supplementary material
Source: HighWire-hosted journal article supplement (https://www.cfp.ca/highwire/filestream/33331/field_highwire_adjunct_files/0/339_Algorithm_eng.pdf)
Supplement: 339_Algorithm_eng.pdf [file 339_Algorithm_eng.pdf]

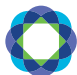

### Why is patient taking a BZRA?

If unsure, find out if history of anxiety, past psychiatrist consult, whether may have been started in hospital for sleep, or for grief reaction.

- Insomnia on its own OR insomnia where underlying comorbidities managed
- For those ≥ 65 years of age: taking BZRA regardless of duration (avoid as first line therapy in older people)
- For those 18-64 years of age: taking BZRA > 4 weeks

- Other sleeping disorders (e.g. restless legs)
- Unmanaged anxiety, depression, physical or mental condition that may be causing or aggravating insomnia
- Benzodiazepine effective specifically for anxiety
- Alcohol withdrawal

**Engage patients** (discuss potential risks, benefits, withdrawal plan, symptoms and duration)

**Recommend Deprescribing**

- Continue BZRA**
- Minimize use of drugs that worsen insomnia (e.g. caffeine, alcohol etc.)
  - Treat underlying condition
  - Consider consulting psychologist or psychiatrist or sleep specialist

- Taper and then stop BZRA**  
(taper slowly in collaboration with patient, for example ~25% every two weeks, and if possible, 12.5% reductions near end and/or planned drug-free days)
- For those ≥ 65 years of age (strong recommendation from systematic review and GRADE approach)
  - For those 18-64 years of age (weak recommendation from systematic review and GRADE approach)
  - Offer behavioural sleeping advice; consider CBT if available (see reverse)

- Monitor every 1-2 weeks for duration of tapering**
- Expected benefits:
- May improve alertness, cognition, daytime sedation and reduce falls
- Withdrawal symptoms:
- Insomnia, anxiety, irritability, sweating, gastrointestinal symptoms (all usually mild and last for days to a few weeks)

Use non-drug approaches to manage insomnia

Use behavioral approaches and/or CBT (see reverse)

- If symptoms relapse:
- Consider
- Maintaining current BZRA dose for 1-2 weeks, then continue to taper at slow rate
- Alternate drugs
- Other medications have been used to manage insomnia. Assessment of their safety and effectiveness is beyond the scope of this algorithm. See BZRA deprescribing guideline for details.

© Use freely, with credit to the authors. Not for commercial use. Do not modify or translate without permission.

This work is licensed under a Creative Commons Attribution-NonCommercial-ShareAlike 4.0 International License. Contact [deprescribing@bruyere.org](mailto:deprescribing@bruyere.org) or visit [deprescribing.org](http://deprescribing.org) for more information.

Pottie K, Thompson W, Davies S, Grenier J, Sadowski CA, Welch V, et al. Deprescribing benzodiazepine receptor agonists. Evidence-based clinical practice guideline. *Can Fam Physician* 2018;64:339-51 (Eng), e209-24 (Fr).

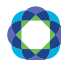

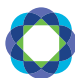

## BZRA Availability

| BZRA                                        | Strength                    |
|---------------------------------------------|-----------------------------|
| Alprazolam (Xanax®) <sup>T</sup>            | 0.25 mg, 0.5 mg, 1 mg, 2 mg |
| Bromazepam (Lectopam®) <sup>T</sup>         | 1.5 mg, 3 mg, 6 mg          |
| Chlordiazepoxide (Librax®) <sup>C</sup>     | 5 mg, 10 mg, 25 mg          |
| Clonazepam (Rivotril®) <sup>T</sup>         | 0.25 mg, 0.5 mg, 1 mg, 2 mg |
| Clorazepate (Tranxene®) <sup>C</sup>        | 3.75 mg, 7.5 mg, 15 mg      |
| Diazepam (Valium®) <sup>T</sup>             | 2 mg, 5 mg, 10 mg           |
| Flurazepam (Dalmane®) <sup>C</sup>          | 15 mg, 30 mg                |
| Lorazepam (Ativan®) <sup>T,S</sup>          | 0.5 mg, 1 mg, 2 mg          |
| Nitrazepam (Mogadon®) <sup>T</sup>          | 5 mg, 10 mg                 |
| Oxazepam (Serax®) <sup>T</sup>              | 10 mg, 15 mg, 30 mg         |
| Temazepam (Restoril®) <sup>C</sup>          | 15 mg, 30 mg                |
| Triazolam (Halcion®) <sup>T</sup>           | 0.125 mg, 0.25 mg           |
| Zopiclone (Imovane®, Rhovane®) <sup>T</sup> | 5mg, 7.5mg                  |
| Zolpidem (Sublinox®) <sup>S</sup>           | 5mg, 10mg                   |

T = tablet, C = capsule, S = sublingual tablet

## BZRA Side Effects

- BZRAs have been associated with:
  - physical dependence, falls, memory disorder, dementia, functional impairment, daytime sedation and motor vehicle accidents
- Risks increase in older persons

## Engaging patients and caregivers

Patients should understand:

- The rationale for deprescribing (associated risks of continued BZRA use, reduced long-term efficacy)
- Withdrawal symptoms (insomnia, anxiety) may occur but are usually mild, transient and short-term (days to a few weeks)
- They are part of the tapering plan, and can control tapering rate and duration

## Tapering doses

- No published evidence exists to suggest switching to long-acting BZRAs reduces incidence of withdrawal symptoms or is more effective than tapering shorter-acting BZRAs
- If dosage forms do not allow 25% reduction, consider 50% reduction initially using drug-free days during latter part of tapering, or switch to lorazepam or oxazepam for final taper steps

## Behavioural management

Primary care:

- Go to bed only when sleepy
- Do not use bed or bedroom for anything but sleep (or intimacy)
- If not asleep within about 20-30 min at the beginning of the night or after an awakening, exit the bedroom
- If not asleep within 20-30 min on returning to bed, repeat #3
- Use alarm to awaken at the same time every morning
- Do not nap
- Avoid caffeine after noon
- Avoid exercise, nicotine, alcohol, and big meals within 2 hrs of bedtime

Institutional care:

- Pull up curtains during the day to obtain bright light exposure
- Keep alarm noises to a minimum
- Increase daytime activity & discourage daytime sleeping
- Reduce number of naps (no more than 30 mins and no naps after 2 pm)
- Offer warm decaf drink, warm milk at night
- Restrict food, caffeine, smoking before bedtime
- Have the resident toilet before going to bed
- Encourage regular bedtime and rising times
- Avoid waking at night to provide direct care
- Offer backrub, gentle massage

## Using CBT

What is cognitive behavioural therapy (CBT)?

- CBT includes 5-6 educational sessions about sleep/insomnia, stimulus control, sleep restriction, sleep hygiene, relaxation training and support

Does it work?

- CBT has been shown in trials to improve sleep outcomes with sustained long-term benefits

Who can provide it?

- Clinical psychologists usually deliver CBT, however, others can be trained or can provide aspects of CBT education; self-help programs are available

How can providers and patients find out about it?

- Some resources can be found here: <http://sleepwellns.ca/>

© Use freely, with credit to the authors. Not for commercial use. Do not modify or translate without permission.

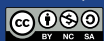

This work is licensed under a Creative Commons Attribution-NonCommercial-ShareAlike 4.0 International License. Contact [deprescribing@bruyere.org](mailto:deprescribing@bruyere.org) or visit [deprescribing.org](http://deprescribing.org) for more information.

Pottie K, Thompson W, Davies S, Grenier J, Sadowski CA, Welch V, et al. Deprescribing benzodiazepine receptor agonists. Evidence-based clinical practice guideline. *Can Fam Physician* 2018;64:339-51 (Eng), e209-24 (Fr).

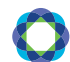

deprescribing.org

INSTITUT DE RECHERCHE  
Bruyère  
RESEARCH INSTITUTE

open  
ONTARIO PHARMACY RESEARCH COLLABORATION
